# Supplementary material
Source: PubMed Central journal article supplement (PMC6105134)
Supplement: LSHSS-49-218-s001.pdf [file LSHSS-49-218-s001.pdf]

**Supplemental Material S1.** Raw data and various accuracy indices for tools using empirically derived cut scores: dialects combined.<sup>a</sup>

|            | Reference Standard DELV-NR |    |    |    | Se  | Sp  | PPV<br>(95% CI)  | NPV<br>(95% CI)  | LR+<br>(95% CI)     | LR-<br>(95% CI)  |
|------------|----------------------------|----|----|----|-----|-----|------------------|------------------|---------------------|------------------|
|            | LI                         |    | TD |    |     |     |                  |                  |                     |                  |
|            | +                          | -  | +  | -  |     |     |                  |                  |                     |                  |
| TROLL      | 33                         | 10 | 14 | 41 | .77 | .75 | .70<br>(.56-.81) | .80<br>(.68-.89) | 3.01<br>(1.86-4.88) | .31<br>(.18-.55) |
| CCC-2      | 28                         | 15 | 17 | 38 | .65 | .69 | .62<br>(.48-.75) | .72<br>(.58-.82) | 2.11<br>(1.31-3.31) | .51<br>(.32-.79) |
| DELV-ST-II | 28                         | 15 | 21 | 34 | .65 | .62 | .57<br>(.43-.70) | .69<br>(.56-.81) | 1.70<br>(1.14-2.55) | .57<br>(.36-.89) |
| DIBELS     | 27                         | 16 | 21 | 34 | .63 | .62 | .56<br>(.42-.69) | .68<br>(.54-.79) | 1.64<br>(1.09-2.47) | .60<br>(.39-.94) |

*Note.* LI = language impairment; TD = typically developing; + = classified as LI by index tool; - = classified as TD by index tool; Se = Sensitivity; Sp = Specificity; PPV = positive predictive value; NPV = negative predictive value; LR+ (95% CI) = positive likelihood ratio with 95% confidence interval; LR- (95% CI) = negative likelihood ratio with 95% confidence interval; TROLL = Teacher Rating of Oral Language and Literacy (Dickinson, McCabe, & Sprague, 2001, 2003); CCC-2 = Children’s Communicative Checklist–Second Edition (Bishop, 2006); DELV-ST-II = Part II of the Diagnostic Evaluation of Language Variation–Screening Test (Seymour, Roeper, & de Villiers, 2003); DIBELS = Dynamic Indicators of Basic Early Literacy Skills–Next (Good, Gruba, & Kaminski, 2009).

<sup>a</sup>Indices calculated with <http://ebm-tools.knowledgetranslation.net/calculator/diagnostic>.

## References

- Bishop, D. V. M. (2006). *CCC-2; Children's Communication Checklist—Second Edition*. San Antonio, TX: Pearson.
- Dickinson, D. K., McCabe, A., & Sprague, K. (2001). *Teacher Rating of Oral Language and Literacy (TROLL): A research-based tool*. Ann Arbor, MI: Center for the Improvement of Early Reading Achievement, University of Michigan.
- Dickinson, D. K., McCabe, A. & Sprague, K. (2003). Teacher Rating of Oral Language and Literacy (TROLL): Individualizing early literacy instruction with a standards-based rating tool. *The Reading Teacher*, 56, 554–569.
- Good, R. H., Gruba, J., & Kaminski, R. A. (2009). *Dynamic Indicators of Basic Early Literacy Skills—Next*. Longmont, CO: Cambium Learning Group.
- Seymour, H. N., Roeper, T. W., & de Villiers, J. (2003). *Diagnostic Evaluation of Language Variation—Screening Test*. San Antonio, TX: PsychCorp.
